# Supplementary material
Source: PubMed Central journal article supplement (PMC11112247)
Supplement: sj-pdf-1-jfm-10.1177_1098612X15582080.pdf [file sj-pdf-1-jfm-10.1177_1098612X15582080.pdf]

**SECTION A – SIGNALMENT + GENERAL QUESTIONS**

Your name  
Your Cat's name  
Breed  
Colour  
Weight (approximate if don't know)  
Sex  
 Male  
 Male neutered  
 Female  
 Female neutered  
Age (if unknown, please estimate)  
Does your cat have access to the outside?  
 Yes  
 No  
What is your cat's normal diet?

**SECTION B – GENERAL HEALTH**

How is your cat's appetite in general?  
 Always hungry  
 Eats all meals  
 Picky eater  
 Poor appetite  
Does your cat have episodes of diarrhea or vomiting?  
 Frequent  
 Occasional  
 Infrequent  
 Never  
Has your cat had any blood tests in the past?  
 Yes  
 No  
If yes, do you know what they were? Were any of these results abnormal?  
Does your cat ever have itchy skin or feet/ear problems/excessive licking?  
 Yes  
 No

Please Specify  
Does your cat suffer from any allergies (e.g. food, skin etc)?  
 Yes  
 No

Please Specify  
Is your cat on any long-term medication?  
 Yes  
 No

If yes what is it and what is it for?  
Does your cat have any known breathing problems?  
 Yes  
 No

Please Specify  
Does your cat cough?  
 Yes  
 No

Does your cat ever collapse?  
 Yes  
 No

Does your cat suffer from any other medical conditions?  
 Yes  
 No

Please Specify  
How is your cat's hearing?  
 Normal hearing  
 Some hearing difficulties  
 Completely deaf  
 Don't know

How is your cat's eye sight?  
 Normal  
 Some visual difficulties  
 Completely blind  
 Don't know

**SECTION C – ABOUT THE FITS IN GENERAL**

How old was your cat when it had its first fit? (if unknown, please estimate)  
How is your cat in-between fits?  
 Normal  
 Abnormal

Please Specify  
Has your cat's character changed since the fits started?

No change in character  
 My cat wants to stay close to me  
 My cat is more aggressive  
 My cat is more restless  
 My cat is more disorientated  
 Other, please specify  
Have you noticed any of the following since your cat started to have fits?  
 Weakness/not coordinated in the back legs  
 Dramatic weight loss (>1kg)  
 Difficulties seeing  
 Difficulties hearing  
 Less responsive to being called  
 Not jumping  
 Getting stuck in corners  
 Toileting in the house inappropriately  
 Other, please specify  
Has your cat had any blood tests in the past to investigate the fits?  
 Yes  
 No

Please Specify  
Has your cat had any other investigations in the past to investigate the fits (e.g. MRI)?  
 Yes  
 No

Please Specify  
Do all the fits look the same?  
 Yes  
 No  
If 'no' please specify the number of types of fit your cat has suffered  
If 'no' please specify which was the first fit you were aware of your cat suffering  
If 'no', do different sounds trigger different types of fit?  
 Yes  
 No

If yes, please explain  
Would you be able to reliably provoke a fit with a noise?  
 Yes  
 No

Do you feel that the seizures have affected your cat's quality of life?  
 Yes  
 No  
 Partly

Do you feel that other symptoms aside from the seizures have affected your cat's quality of life?  
 Yes  
 No  
 Partly  
 Not applicable

**SECTION D – CHARACTERIZING THE FITS**

**PLEASE FILL IN THE FOLLOWING QUESTIONS FOR EACH TYPE OF FIT**

Please describe the fit in your own words  
How often does your cat currently have this type of fit?

More than once every day  
 Once every day  
 Once every week  
 Once every 2 weeks  
 Once every month  
 Once every 2 months  
 Once every 3 – 6 months

How many of these fits does your cat have in a day?  
 Only one fit in 24 hours  
 Two or more fits in 24 hours ('cluster')

What are the most number of these fits your cat has suffered in 1 day?  
On average how long does one of these fits tend to last?

<5 seconds  
 5 to 30 seconds  
 30 seconds to 1 minute  
 1 to 2 minutes  
 2 to 5 minutes

5 to 10 minutes  
 >10 minutes  
Has there been any change in how long these fits/seizures last since they began?

Longer  
 Shorter  
 No change  
Has there been any change in how often these fits/seizures occur since they began?

Increased occurrence  
 Decreased occurrence  
 No change

Have there been any other changes in the fits since they started? If so please describe  
What does your cat do during one of these fits/seizures (please tick one box only that best describes)

My cat shakes violently during a fit  
 My cat has jerking movements like it has been shocked during a fit  
 My cat becomes unresponsive with no obvious movements during a fit  
Please describe these fits by ticking all appropriate boxes.

My cat is confused and/or dazed and/or disoriented DURING the fit  
 My cat is able to look into my eyes DURING the fit

My cat is able to hear me DURING the fit  
 My cat is conscious/aware DURING the fit  
 My cat is able to respond to me DURING the fit

The whole body is involved from the beginning  
 One side of the body can be affected only  
 At the start, only a part of the body is involved (e.g. it starts with the head or the leg), later the whole body is affected by the fit

Just part of the body is involved (e.g. face or leg(s) only) throughout the fit  
 My cat passes urine and / or feces DURING the fit

My cat salivates/froths at the mouth DURING the fit  
 My cat is able to stand DURING the fit  
Does your cat show any of the following signs during one of these fits? Please tick all boxes that apply:

Shaking  
 Excessive scratching  
 Wobbly on legs/clumsy  
 Muscle spasms  
 Ear Twitching  
 Licking movements ("air licking")  
 Complete stiffness of limbs throughout  
 Chewing movements  
 Blinking  
 Rolling of the head

Which parts of the body are affected during one of these fits? Please tick all boxes that apply:

Head and neck  
 Shoulders and Front legs  
 Back and abdomen  
 Hips and back legs  
 Tail  
 Specify if required

In which part of the body does the fit start (tick one box only):  
 Head and neck  
 Shoulders and Front legs  
 Back and abdomen  
 Hips and back legs  
 Tail

Not sure  
What signs does your cat show WHILE RECOVERING from one of these fits?

Wobbly  
 Blind  
 Sleepy  
 Aggressive

- Restless
- Hungry
- Thirsty
- Clingy
- Clingy
- Normal immediately afterwards
- Other, please specify:

How long does it take for your cat to COMPLETELY recover from one of these fits?

- My cat is completely back to normal within minutes of the fit
- My cat is completely back to normal within hours of the fit
- My cat is completely back to normal within 24 hours of the fit
- My cat takes several days to recover completely

Can you predict if a fit is going to happen?

- Yes
- No

If yes, please explain

How do you respond when your cat has a fit?

After an episode has started can you stop it?

- Yes
- No

Can you do anything that changes the course of the fit at all? Please explain briefly

Which of the following can induce one of these specific fits?

- Sound
- Touch
- Light (e.g. flashing lights on TV etc)
- Heat
- Cold
- Stress
- Excitement
- Other, please specify

Does this type of fit ever progress into a different type of fit?

- Yes
- No

If yes, please explain

Is it a particular noise that triggers this type of fit?

- Yes
- No

If yes, please explain

Would you be able to provoke this specific fit with a particular noise?

- Yes
- No

Considering the noise that most reliably provokes this specific seizure in your cat, how many times have you been aware of this noise triggering the fit in your cat?

- ≤ 2
- 3 to 5
- 6 to 10
- > 10

Are the sounds that induce these fits more high- or low-pitch?

- High-pitch
- Low-pitch
- Both

Please list any sounds that you know trigger these fits:

Are the sounds that induce the fits more high- or low-pitch?

- High-pitch
- Low-pitch
- Both

Do these fits ever occur without an obvious trigger?

- Yes
- No

Do you find that avoiding the sound allows for suitable control of this type of fit?

- Yes
- No
- Partly

Have these trigger sounds always caused your cat to have these fits?

- Always caused these fits
- My cat was once unaffected by them

Do you feel that these fits have affected your cat's quality of life?

- Yes
- No

Partly

Do you feel that these specific fits have affected your cat's quality of life?

- Yes
- No

Partly

Have you found that any of the following have made the fits worse?

- Cat treats
- De-worming
- Excitement
- Being in season
- Inoculations

Has your cat received any medications for seizures (please repeat the remaining questions for each medication prescribed)?

- Yes
- No

If 'yes' what medication has been tried (dosage if available) and for how long?

Did this type of fit respond to this medication?

- Yes
- No

Partly

Did you stop giving your cat the medication and if yes, what was the reason?

- Yes
- No

If yes, please explain
